# Supplementary figures and images for: Pain Control for Sickle Cell Crisis, a Novel Approach? A Retrospective Study
Source: MDPI journal article supplement (doi:10.3390/medicina59122196), 2023-12-18

Figure S1. Pain trajectory after LRA (NPS evolution).

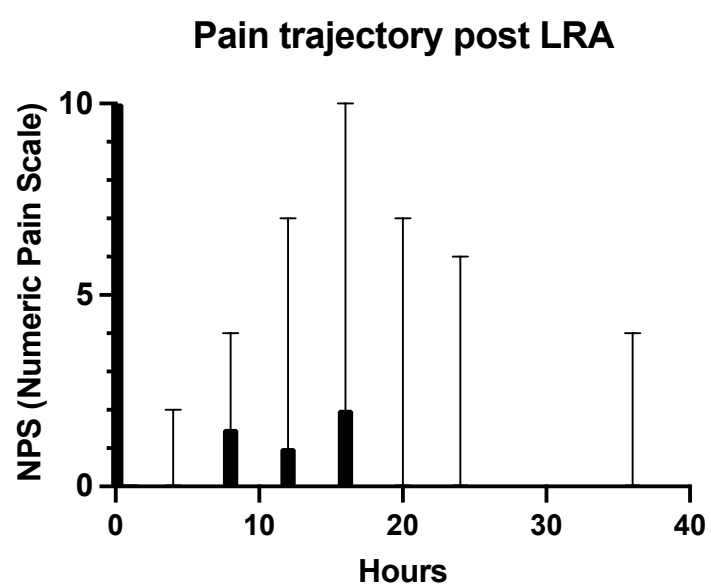

Supplement: s1 [file s1]
